# Supplementary material
Source: MDPI journal article supplement (https://www.mdpi.com/2075-163X/12/3/283)
Supplement: s1 [file s1]

# Supplementary Materials: Geochemistry and Zircon U–Pb Geochronology of the Zhuxi Granites in the Jingdezhen Area, Jiangxi Province, China: Implications for the Mesozoic Tectonic Development of South China

Hailong Huo, Da Zhang\*, Zhengle Chen\*, Yongjun Di, Xiaolong He, Ning Li and Bojie Hu

**Table S1.** Simplified sample descriptions, mineral assemblages, sampling location and age of the representative Zhuxi granites, Northeast Jiangxi Province.

| Sample                                                                          | Location | Depth (m) | Lithology        | Color         | Texture                                                               | Mineral Assemblage                                                                            | Age (Ma)            | References       |
|---------------------------------------------------------------------------------|----------|-----------|------------------|---------------|-----------------------------------------------------------------------|-----------------------------------------------------------------------------------------------|---------------------|------------------|
| Zk5406-H285<br>Zk5406-H289<br>Zk5406-H307<br>Zk5406-H313<br>Zk5406-H325<br>Tw13 | Zk5406   | 1501~1557 | granodiorite     | White to gray | Granitic texture                                                      | Plagioclase, alkali feldspar and quartz, with subordinate biotite and muscovite               | 159 ±1              | This study       |
| Zk5406-H462<br>Zk5406-H465<br>Zk5406-H469<br>Zk5406-H522<br>Zk5406-H530         | Zk5406   | 1753~1764 | biotite granite  | White to gray | Granitic texture                                                      | Plagioclase, alkali feldspar, quartz and biotite                                              | 147 ±2              |                  |
| Zk5406-H569<br>Zk5406-H573<br>Zk5406-H582<br>ZK4209-1295                        | Zk5406   | 1841~1918 | Two-mica granite | White to gray | Granitic texture                                                      | Quartz, alkali feldspar, and plagioclase, with subordinate biotite and muscovite              | 147 ±1<br>153.4±1.0 |                  |
| Zk5406-1942                                                                     | Zk5406   | 1942      | Granite porphyry | White to gray | Porphyry texture, felsitic or microcrystalline texture for groundmass | The phenocryst consists of quartz, alkali feldspar, plagioclase, muscovite with minor biotite | 150±1               |                  |
| Zk4209-609                                                                      | Zk4209   | 609       | White granite    | White to gray | Granitic texture                                                      | Quartz, alkali feldspar, plagioclase, muscovite with minor biotite                            | 152.9±1.7           |                  |
| Zk5406-1999                                                                     | Zk5406   | 1999      | Biotite granite  | Gray          | Granitic texture                                                      | Quartz, alkali feldspar, plagioclase, biotite with minor muscovite                            | 153.5±1.0           | Pan et al., 2018 |

**Table S2.** LA–ICP–MS U–Pb zircon ages of Zhuxi granites sample Zk4212-289, Tw13, and Zk4212-582.

| concentration |      |        |        |                                           |            |                                          |            |                                          |            |                                           |            |                                          |            |                                          |            |      | Radiogenic ratios |  |  |  |  |  | Age (Ma) |  |  |  |  |  |
|---------------|------|--------|--------|-------------------------------------------|------------|------------------------------------------|------------|------------------------------------------|------------|-------------------------------------------|------------|------------------------------------------|------------|------------------------------------------|------------|------|-------------------|--|--|--|--|--|----------|--|--|--|--|--|
| Spot          | Th/U | Th     | U      | $\frac{^{207}\text{Pb}}{^{206}\text{Pb}}$ | 1 $\delta$ | $\frac{^{207}\text{Pb}}{^{235}\text{U}}$ | 1 $\delta$ | $\frac{^{206}\text{Pb}}{^{238}\text{U}}$ | 1 $\delta$ | $\frac{^{207}\text{Pb}}{^{206}\text{Pb}}$ | 1 $\sigma$ | $\frac{^{207}\text{Pb}}{^{235}\text{U}}$ | 1 $\delta$ | $\frac{^{206}\text{Pb}}{^{238}\text{U}}$ | 1 $\delta$ | Con. |                   |  |  |  |  |  |          |  |  |  |  |  |
| Zk4212-H289   |      |        |        |                                           |            |                                          |            |                                          |            |                                           |            |                                          |            |                                          |            |      |                   |  |  |  |  |  |          |  |  |  |  |  |
| 91500std      | 0.39 | 31.74  | 81.52  | 0.0747                                    | 0.0033     | 1.8650                                   | 0.0820     | 0.1815                                   | 0.0031     | 1061                                      | 87         | 1069                                     | 29         | 1075                                     | 17         | 99%  |                   |  |  |  |  |  |          |  |  |  |  |  |
| 91500std      | 0.39 | 32.24  | 83.34  | 0.0750                                    | 0.0031     | 1.8354                                   | 0.0828     | 0.1769                                   | 0.0034     | 1069                                      | 84         | 1058                                     | 30         | 1050                                     | 18         | 99%  |                   |  |  |  |  |  |          |  |  |  |  |  |
| 1             | 0.38 | 207.19 | 543.51 | 0.0504                                    | 0.0009     | 0.1745                                   | 0.0033     | 0.0251                                   | 0.0003     | 212                                       | 42         | 163                                      | 3          | 160                                      | 2          | 91%  |                   |  |  |  |  |  |          |  |  |  |  |  |
| 2             | 0.55 | 315.03 | 577.49 | 0.0501                                    | 0.0010     | 0.1731                                   | 0.0035     | 0.0251                                   | 0.0003     | 199                                       | 45         | 162                                      | 3          | 160                                      | 2          | 98%  |                   |  |  |  |  |  |          |  |  |  |  |  |

|             |      |         |         |        |        |        |        |        |        |      |     |      |    |      |    |     |
|-------------|------|---------|---------|--------|--------|--------|--------|--------|--------|------|-----|------|----|------|----|-----|
| 3           | 0.53 | 195.67  | 366.40  | 0.0493 | 0.0013 | 0.1717 | 0.0046 | 0.0252 | 0.0003 | 164  | 60  | 161  | 4  | 161  | 2  | 94% |
| 4           | 0.23 | 224.39  | 958.22  | 0.0501 | 0.0007 | 0.1738 | 0.0027 | 0.0252 | 0.0003 | 198  | 33  | 163  | 3  | 160  | 2  | 96% |
| 5           | 0.21 | 609.91  | 2896.08 | 0.0498 | 0.0006 | 0.1732 | 0.0023 | 0.0252 | 0.0003 | 187  | 27  | 162  | 2  | 160  | 2  | 99% |
| 6           | 0.30 | 784.80  | 2606.58 | 0.0501 | 0.0006 | 0.1750 | 0.0024 | 0.0253 | 0.0003 | 201  | 27  | 164  | 2  | 161  | 2  | 99% |
| 7           | 0.20 | 239.98  | 1199.07 | 0.0494 | 0.0006 | 0.1699 | 0.0026 | 0.0250 | 0.0003 | 165  | 31  | 159  | 2  | 159  | 2  | 97% |
| 8           | 0.68 | 150.93  | 222.21  | 0.0489 | 0.0021 | 0.1667 | 0.0072 | 0.0247 | 0.0003 | 145  | 100 | 157  | 7  | 157  | 2  | 99% |
| 9           | 0.73 | 159.29  | 217.76  | 0.0507 | 0.0025 | 0.1745 | 0.0089 | 0.0250 | 0.0003 | 227  | 113 | 163  | 8  | 159  | 2  | 96% |
| 10          | 0.18 | 276.57  | 1508.30 | 0.0491 | 0.0006 | 0.1703 | 0.0024 | 0.0251 | 0.0003 | 154  | 29  | 160  | 2  | 160  | 2  | 93% |
| 91500std    | 0.39 | 24.28   | 62.58   | 0.0723 | 0.0036 | 1.7976 | 0.0867 | 0.1807 | 0.0027 | 994  | 100 | 1045 | 31 | 1071 | 15 | 97% |
| 91500std    | 0.40 | 25.19   | 62.99   | 0.0775 | 0.0035 | 1.9028 | 0.0865 | 0.1776 | 0.0027 | 1144 | 89  | 1082 | 30 | 1054 | 15 | 97% |
| 11          | 0.49 | 182.34  | 370.33  | 0.0496 | 0.0013 | 0.1723 | 0.0048 | 0.0252 | 0.0003 | 178  | 61  | 161  | 5  | 160  | 2  | 97% |
| 12          | 0.83 | 261.90  | 316.61  | 0.0501 | 0.0028 | 0.1703 | 0.0095 | 0.0246 | 0.0003 | 201  | 129 | 160  | 9  | 157  | 2  | 97% |
| 13          | 1.61 | 476.38  | 295.43  | 0.0498 | 0.0017 | 0.1671 | 0.0060 | 0.0243 | 0.0002 | 185  | 80  | 157  | 6  | 155  | 2  | 95% |
| 14          | 0.57 | 121.00  | 212.26  | 0.0518 | 0.0024 | 0.1747 | 0.0081 | 0.0245 | 0.0003 | 277  | 106 | 163  | 8  | 156  | 2  | 95% |
| 15          | 0.60 | 193.26  | 323.26  | 0.0494 | 0.0019 | 0.1658 | 0.0065 | 0.0243 | 0.0003 | 168  | 88  | 156  | 6  | 155  | 2  | 97% |
| 16          | 1.01 | 150.32  | 149.47  | 0.0490 | 0.0027 | 0.1712 | 0.0098 | 0.0253 | 0.0003 | 149  | 131 | 160  | 9  | 161  | 2  | 96% |
| 17          | 0.67 | 296.52  | 441.19  | 0.0494 | 0.0013 | 0.1753 | 0.0051 | 0.0258 | 0.0003 | 165  | 64  | 164  | 5  | 164  | 2  | 96% |
| 18          | 1.07 | 141.38  | 132.23  | 0.0498 | 0.0048 | 0.1728 | 0.0169 | 0.0252 | 0.0003 | 187  | 226 | 162  | 16 | 160  | 2  | 90% |
| 19          | 1.05 | 263.83  | 251.45  | 0.0498 | 0.0024 | 0.1758 | 0.0089 | 0.0256 | 0.0003 | 184  | 112 | 164  | 8  | 163  | 2  | 98% |
| 20          | 1.00 | 82.83   | 83.08   | 0.1364 | 0.0092 | 0.5770 | 0.0413 | 0.0307 | 0.0006 | 2182 | 118 | 463  | 33 | 195  | 4  | 94% |
| 91500std    | 0.39 | 19.45   | 49.89   | 0.0737 | 0.0037 | 1.8163 | 0.0876 | 0.1790 | 0.0030 | 1035 | 103 | 1051 | 32 | 1061 | 16 | 99% |
| 91500std    | 0.39 | 19.51   | 49.90   | 0.0760 | 0.0036 | 1.8841 | 0.0891 | 0.1794 | 0.0029 | 1096 | 96  | 1076 | 31 | 1064 | 16 | 98% |
| 21          | 1.49 | 178.81  | 120.15  | 0.0493 | 0.0036 | 0.1683 | 0.0127 | 0.0248 | 0.0003 | 162  | 171 | 158  | 12 | 158  | 2  | 96% |
| 22          | 0.63 | 199.38  | 316.72  | 0.0492 | 0.0017 | 0.1724 | 0.0069 | 0.0254 | 0.0003 | 156  | 83  | 162  | 7  | 162  | 2  | 92% |
| 23          | 0.71 | 233.00  | 329.90  | 0.0497 | 0.0017 | 0.1710 | 0.0063 | 0.0249 | 0.0003 | 182  | 81  | 160  | 6  | 159  | 2  | 99% |
| 24          | 0.08 | 288.97  | 3821.85 | 0.0490 | 0.0006 | 0.1728 | 0.0029 | 0.0256 | 0.0003 | 146  | 27  | 162  | 3  | 163  | 2  | 99% |
| 25          | 0.30 | 439.93  | 1469.42 | 0.0496 | 0.0007 | 0.1755 | 0.0035 | 0.0256 | 0.0004 | 178  | 32  | 164  | 3  | 163  | 3  | 96% |
| 26          | 0.43 | 412.80  | 961.00  | 0.0499 | 0.0009 | 0.1744 | 0.0037 | 0.0253 | 0.0004 | 192  | 40  | 163  | 3  | 161  | 2  | 93% |
| 27          | 0.22 | 604.14  | 2763.15 | 0.0498 | 0.0009 | 0.1718 | 0.0037 | 0.0250 | 0.0003 | 186  | 44  | 161  | 3  | 159  | 2  | 99% |
| 28          | 0.27 | 173.52  | 652.43  | 0.0497 | 0.0010 | 0.1664 | 0.0035 | 0.0243 | 0.0003 | 182  | 47  | 156  | 3  | 155  | 2  | 96% |
| 91500std    | 0.40 | 16.75   | 42.20   | 0.0740 | 0.0031 | 1.8526 | 0.0806 | 0.1801 | 0.0026 | 1043 | 84  | 1064 | 29 | 1068 | 14 | 99% |
| 91500std    | 0.39 | 16.48   | 42.70   | 0.0757 | 0.0031 | 1.8478 | 0.0755 | 0.1782 | 0.0031 | 1088 | 79  | 1063 | 27 | 1057 | 17 | 99% |
| <b>Tw13</b> |      |         |         |        |        |        |        |        |        |      |     |      |    |      |    |     |
| 1           | 0.41 | 1053.31 | 2571.00 | 0.0487 | 0.0007 | 0.1441 | 0.0023 | 0.0215 | 0.0002 | 130  | 31  | 137  | 2  | 137  | 1  | 98% |
| 2           | 0.22 | 977.38  | 4524.00 | 0.0497 | 0.0006 | 0.1441 | 0.0020 | 0.0210 | 0.0002 | 183  | 28  | 137  | 2  | 134  | 1  | 98% |
| 3           | 0.29 | 195.79  | 679.00  | 0.1806 | 0.0032 | 0.7005 | 0.0156 | 0.0281 | 0.0003 | 2531 | 186 | 539  | 12 | 179  | 2  | 99% |
| 4           | 0.23 | 669.76  | 2935.00 | 0.0508 | 0.0006 | 0.1491 | 0.0020 | 0.0213 | 0.0002 | 213  | 27  | 141  | 2  | 136  | 1  | 99% |
| 5           | 0.48 | 168.38  | 353.00  | 0.0489 | 0.0018 | 0.1585 | 0.0060 | 0.0235 | 0.0002 | 132  | 61  | 149  | 6  | 150  | 2  | 99% |
| 6           | 0.25 | 705.90  | 2791.00 | 0.0497 | 0.0006 | 0.1841 | 0.0026 | 0.0269 | 0.0003 | 147  | 24  | 172  | 2  | 171  | 2  | 97% |
| 7           | 0.38 | 390.45  | 1030.00 | 0.0498 | 0.0008 | 0.1626 | 0.0029 | 0.0237 | 0.0002 | 153  | 36  | 153  | 3  | 151  | 1  | 98% |
| 8           | 0.14 | 715.44  | 5247.00 | 0.1396 | 0.0021 | 0.5113 | 0.0093 | 0.0266 | 0.0003 | 2198 | 95  | 419  | 8  | 169  | 2  | 98% |
| 9           | 0.38 | 237.44  | 619.00  | 0.2199 | 0.0035 | 1.0498 | 0.0214 | 0.0346 | 0.0004 | 3067 | 138 | 729  | 15 | 219  | 2  | 97% |
| 10          | 0.78 | 321.71  | 412.00  | 0.0499 | 0.0015 | 0.1611 | 0.0049 | 0.0234 | 0.0002 | 194  | 41  | 152  | 5  | 149  | 1  | 99% |
| 91500std    | 0.39 | 17.86   | 45.59   | 0.0765 | 0.0032 | 1.9153 | 0.0763 | 0.1823 | 0.0032 | 1107 | 77  | 1086 | 27 | 1080 | 17 | 99% |
| 91500std    | 0.39 | 18.25   | 46.50   | 0.0733 | 0.0036 | 1.7851 | 0.0925 | 0.1760 | 0.0032 | 1022 | 99  | 1040 | 34 | 1045 | 17 | 99% |
| 11          | 0.49 | 166.57  | 337.00  | 0.0501 | 0.0021 | 0.1620 | 0.0082 | 0.0234 | 0.0003 | 213  | 62  | 152  | 8  | 149  | 2  | 99% |

|                    |      |         |         |        |        |        |        |        |        |      |     |      |    |      |    |     |
|--------------------|------|---------|---------|--------|--------|--------|--------|--------|--------|------|-----|------|----|------|----|-----|
| 12                 | 0.53 | 225.13  | 423.00  | 0.0503 | 0.0013 | 0.1736 | 0.0048 | 0.0250 | 0.0002 | 209  | 48  | 163  | 5  | 159  | 2  | 95% |
| 13                 | 0.20 | 324.27  | 1654.00 | 0.0501 | 0.0009 | 0.1736 | 0.0037 | 0.0252 | 0.0003 | 214  | 40  | 163  | 3  | 160  | 2  | 99% |
| 14                 | 0.44 | 529.36  | 1197.00 | 0.1590 | 0.0024 | 0.6030 | 0.0106 | 0.0275 | 0.0003 | 2373 | 105 | 479  | 8  | 175  | 2  | 93% |
| 15                 | 0.16 | 284.11  | 1722.00 | 0.0498 | 0.0006 | 0.1877 | 0.0027 | 0.0273 | 0.0003 | 155  | 24  | 175  | 3  | 174  | 2  | 92% |
| 16                 | 0.53 | 189.55  | 357.00  | 0.0485 | 0.0014 | 0.1505 | 0.0048 | 0.0225 | 0.0002 | 127  | 55  | 142  | 5  | 144  | 1  | 90% |
| 17                 | 0.37 | 240.70  | 658.00  | 0.0488 | 0.0011 | 0.1497 | 0.0034 | 0.0222 | 0.0002 | 133  | 44  | 142  | 3  | 142  | 1  | 95% |
| 18                 | 0.67 | 254.80  | 379.00  | 0.0499 | 0.0015 | 0.1791 | 0.0055 | 0.0260 | 0.0003 | 197  | 52  | 167  | 5  | 166  | 2  | 99% |
| 19                 | 0.71 | 202.76  | 285.00  | 0.0491 | 0.0016 | 0.1590 | 0.0063 | 0.0235 | 0.0002 | 153  | 55  | 150  | 6  | 150  | 2  | 96% |
| 20                 | 0.24 | 266.23  | 1097.00 | 0.0652 | 0.0008 | 0.7226 | 0.0120 | 0.0804 | 0.0012 | 872  | 43  | 552  | 9  | 499  | 7  | 97% |
| 91500std           | 0.39 | 20.93   | 53.42   | 0.0748 | 0.0030 | 1.7978 | 0.0720 | 0.1742 | 0.0028 | 1063 | 77  | 1045 | 26 | 1035 | 15 | 99% |
| 91500std           | 0.39 | 20.93   | 53.25   | 0.0750 | 0.0034 | 1.9026 | 0.0842 | 0.1841 | 0.0028 | 1133 | 95  | 1082 | 29 | 1089 | 15 | 99% |
| 21                 | 0.58 | 201.21  | 346.00  | 0.0493 | 0.0009 | 0.1560 | 0.0034 | 0.0230 | 0.0002 | 155  | 40  | 147  | 3  | 146  | 1  | 93% |
| 22                 | 1.40 | 1084.41 | 774.00  | 0.0489 | 0.0010 | 0.1593 | 0.0039 | 0.0237 | 0.0002 | 145  | 42  | 150  | 4  | 151  | 1  | 99% |
| 23                 | 0.84 | 384.27  | 456.00  | 0.0490 | 0.0009 | 0.1539 | 0.0034 | 0.0228 | 0.0002 | 147  | 40  | 145  | 3  | 145  | 1  | 97% |
| 24                 | 0.12 | 585.30  | 4948.00 | 0.0502 | 0.0006 | 0.1634 | 0.0024 | 0.0236 | 0.0002 | 216  | 28  | 154  | 2  | 137  | 1  | 99% |
| <b>Zk4212-H582</b> |      |         |         |        |        |        |        |        |        |      |     |      |    |      |    |     |
| 1                  | 0.42 | 406.27  | 978.53  | 0.0880 | 0.0020 | 0.3272 | 0.0082 | 0.0270 | 0.0003 | 1383 | 43  | 287  | 7  | 172  | 2  | 99% |
| 2                  | 1.03 | 213.71  | 207.32  | 0.0490 | 0.0025 | 0.1551 | 0.0084 | 0.0230 | 0.0003 | 147  | 121 | 146  | 8  | 146  | 2  | 97% |
| 3                  | 0.68 | 932.30  | 1380.56 | 0.0491 | 0.0010 | 0.1551 | 0.0039 | 0.0229 | 0.0003 | 153  | 48  | 146  | 4  | 146  | 2  | 99% |
| 4                  | 0.48 | 147.01  | 307.82  | 0.0495 | 0.0014 | 0.1561 | 0.0048 | 0.0229 | 0.0002 | 171  | 68  | 147  | 4  | 146  | 2  | 94% |
| 5                  | 0.27 | 552.98  | 2011.11 | 0.0492 | 0.0006 | 0.1563 | 0.0021 | 0.0231 | 0.0002 | 156  | 28  | 147  | 2  | 147  | 2  | 94% |
| 6                  | 0.22 | 258.12  | 1160.91 | 0.0495 | 0.0008 | 0.1600 | 0.0028 | 0.0234 | 0.0003 | 172  | 37  | 151  | 3  | 149  | 2  | 99% |
| 91500std           | 0.39 | 24.45   | 61.97   | 0.0740 | 0.0030 | 1.8114 | 0.0729 | 0.1772 | 0.0031 | 1043 | 78  | 1050 | 26 | 1052 |    | 99% |
| 91500std           | 0.40 | 24.81   | 62.09   | 0.0758 | 0.0032 | 1.8890 | 0.0772 | 0.1811 | 0.0032 | 1100 | 81  | 1077 | 27 | 1073 |    | 99% |
| 7                  | 0.81 | 226.32  | 279.07  | 0.0491 | 0.0026 | 0.1579 | 0.0085 | 0.0233 | 0.0003 | 153  | 123 | 149  | 8  | 149  | 2  | 99% |
| 8                  | 0.44 | 68.93   | 157.06  | 0.0493 | 0.0028 | 0.1583 | 0.0094 | 0.0233 | 0.0002 | 162  | 135 | 149  | 9  | 148  | 2  | 95% |
| 9                  | 0.22 | 279.35  | 1278.24 | 0.0491 | 0.0007 | 0.1562 | 0.0024 | 0.0231 | 0.0002 | 153  | 32  | 147  | 2  | 147  | 1  | 99% |
| 10                 | 0.59 | 178.67  | 300.69  | 0.0487 | 0.0050 | 0.1596 | 0.0170 | 0.0238 | 0.0003 | 131  | 240 | 150  | 16 | 152  | 2  | 94% |
| 11                 | 0.36 | 302.03  | 842.68  | 0.0491 | 0.0008 | 0.1593 | 0.0029 | 0.0235 | 0.0003 | 153  | 37  | 150  | 3  | 150  | 2  | 99% |
| 12                 | 0.38 | 288.96  | 758.62  | 0.0489 | 0.0008 | 0.1581 | 0.0030 | 0.0234 | 0.0003 | 145  | 40  | 149  | 3  | 149  | 2  | 99% |
| 13                 | 0.49 | 477.60  | 984.44  | 0.0491 | 0.0009 | 0.1584 | 0.0029 | 0.0234 | 0.0002 | 152  | 41  | 149  | 3  | 149  | 1  | 99% |
| 14                 | 0.58 | 226.24  | 391.43  | 0.0962 | 0.0022 | 0.3575 | 0.0089 | 0.0270 | 0.0003 | 1552 | 42  | 310  | 8  | 171  | 2  | 94% |
| 15                 | 0.41 | 396.65  | 969.67  | 0.0482 | 0.0008 | 0.1542 | 0.0027 | 0.0232 | 0.0003 | 109  | 38  | 146  | 3  | 148  | 2  | 95% |
| 16                 | 1.02 | 322.98  | 316.73  | 0.0493 | 0.0035 | 0.1616 | 0.0121 | 0.0238 | 0.0003 | 160  | 166 | 152  | 11 | 152  | 2  | 98% |
| 91500std           | 0.40 | 25.02   | 63.32   | 0.0768 | 0.0035 | 1.9114 | 0.0869 | 0.1797 | 0.0031 | 1117 | 86  | 1085 | 30 | 1065 | 17 | 98% |
| 91500std           | 0.39 | 24.92   | 63.33   | 0.0729 | 0.0036 | 1.7890 | 0.0855 | 0.1786 | 0.0031 | 1013 | 100 | 1041 | 31 | 1060 | 17 | 98% |
| 17                 | 1.01 | 177.62  | 176.15  | 0.0711 | 0.0054 | 0.2491 | 0.0190 | 0.0254 | 0.0003 | 960  | 154 | 226  | 17 | 162  | 2  | 94% |
| 18                 | 0.17 | 300.46  | 1806.49 | 0.0496 | 0.0007 | 0.1574 | 0.0024 | 0.0230 | 0.0002 | 175  | 31  | 148  | 2  | 147  | 1  | 96% |
| 19                 | 0.56 | 153.78  | 274.20  | 0.0497 | 0.0034 | 0.1558 | 0.0108 | 0.0227 | 0.0003 | 181  | 159 | 147  | 10 | 145  | 2  | 99% |
| 20                 | 1.01 | 303.07  | 300.74  | 0.1531 | 0.0043 | 0.5877 | 0.0188 | 0.0278 | 0.0003 | 2381 | 48  | 469  | 15 | 177  | 2  | 99% |
| 21                 | 1.47 | 373.52  | 254.88  | 0.0493 | 0.0047 | 0.1563 | 0.0147 | 0.0230 | 0.0003 | 162  | 223 | 147  | 14 | 147  | 2  | 97% |
| 22                 | 0.28 | 334.39  | 1176.99 | 0.0486 | 0.0007 | 0.1557 | 0.0025 | 0.0232 | 0.0002 | 130  | 35  | 147  | 2  | 148  | 1  | 99% |
| 23                 | 0.67 | 649.41  | 963.52  | 0.0605 | 0.0016 | 0.2084 | 0.0058 | 0.0250 | 0.0003 | 622  | 57  | 192  | 5  | 159  | 2  | 96% |
| 24                 | 0.54 | 198.67  | 369.77  | 0.0497 | 0.0034 | 0.1526 | 0.0105 | 0.0223 | 0.0002 | 182  | 157 | 144  | 10 | 142  | 1  | 95% |
| 91500std           | 0.39 | 25.03   | 64.93   | 0.0732 | 0.0032 | 1.7693 | 0.0811 | 0.1732 | 0.0040 | 1020 | 90  | 1034 | 30 | 1030 | 22 | 99% |
| 91500std           | 0.38 | 24.58   | 64.06   | 0.0765 | 0.0038 | 1.9311 | 0.0884 | 0.1851 | 0.0062 | 1109 | 99  | 1092 | 31 | 1095 | 34 | 99% |

**Table S3.** Major oxide (wt.%) composition of the Zhuxi Granites.

| Sample<br>(ZK4212) | Location<br>(depth)(m) | lithology        | SiO <sub>2</sub> | TiO <sub>2</sub> | Al <sub>2</sub> O <sub>3</sub> | Fe <sub>2</sub> O <sub>3</sub> | FeO  | MgO  | CaO  | Na <sub>2</sub> O | K <sub>2</sub> O | MnO  | P <sub>2</sub> O <sub>5</sub> | LOI  | TOTAL | Mg#   | A/CNK | ALK  | A/NK |
|--------------------|------------------------|------------------|------------------|------------------|--------------------------------|--------------------------------|------|------|------|-------------------|------------------|------|-------------------------------|------|-------|-------|-------|------|------|
| H285               | 1501                   | granodiorite     | 69.65            | 0.11             | 17.21                          | 0.41                           | 0.16 | 0.40 | 2.51 | 0.14              | 4.54             | 0.03 | 0.17                          | 4.56 | 99.90 | 57.47 | 1.77  | 4.69 | 3.34 |
| H289               | 1507                   | granodiorite     | 68.36            | 0.14             | 16.26                          | 0.57                           | 0.25 | 0.36 | 4.22 | 0.13              | 4.12             | 0.06 | 0.16                          | 5.27 | 99.90 | 45.73 | 1.32  | 4.26 | 3.47 |
| H307               | 1531                   | granodiorite     | 66.09            | 0.13             | 18.45                          | 0.87                           | 0.34 | 0.26 | 4.17 | 0.24              | 4.62             | 0.05 | 0.45                          | 4.23 | 99.90 | 29.50 | 1.42  | 4.86 | 3.42 |
| H313               | 1541                   | granodiorite     | 72.67            | 0.16             | 15.41                          | 0.82                           | 0.25 | 0.28 | 2.66 | 0.06              | 4.11             | 0.05 | 0.13                          | 3.30 | 99.89 | 33.69 | 1.64  | 4.17 | 3.39 |
| H325               | 1557                   | granodiorite     | 74.46            | 0.09             | 13.12                          | 1.30                           | 0.33 | 0.26 | 3.13 | 0.08              | 3.50             | 0.06 | 0.22                          | 3.38 | 99.95 | 23.37 | 1.36  | 3.59 | 3.34 |
| H462               | 1753                   | biotite granite  | 71.12            | 0.27             | 15.08                          | 0.24                           | 1.74 | 0.40 | 1.90 | 2.35              | 4.86             | 0.05 | 0.18                          | 1.75 | 99.95 | 26.90 | 1.20  | 7.21 | 1.65 |
| H465               | 1758                   | biotite granite  | 70.17            | 0.26             | 16.10                          | 0.38                           | 1.50 | 0.41 | 1.83 | 0.90              | 5.18             | 0.06 | 0.20                          | 2.92 | 99.90 | 28.21 | 1.55  | 6.08 | 2.27 |
| H469               | 1764                   | biotite granite  | 69.37            | 0.26             | 15.96                          | 0.35                           | 1.70 | 0.37 | 1.87 | 1.90              | 5.16             | 0.06 | 0.17                          | 2.67 | 99.86 | 24.83 | 1.32  | 7.06 | 1.83 |
| H522               | 1841                   | Two-mica granite | 74.22            | 0.09             | 14.52                          | 0.27                           | 0.62 | 0.13 | 0.94 | 2.69              | 4.84             | 0.04 | 0.14                          | 1.37 | 99.88 | 21.75 | 1.28  | 7.53 | 1.50 |
| H530               | 1854                   | Two-mica granite | 72.14            | 0.09             | 17.62                          | 0.26                           | 0.55 | 0.17 | 0.85 | 0.22              | 5.31             | 0.03 | 0.17                          | 2.45 | 99.86 | 27.73 | 2.30  | 5.53 | 2.88 |
| H569               | 1912                   | Two-mica granite | 70.33            | 0.15             | 17.56                          | 0.54                           | 0.59 | 0.26 | 1.26 | 0.50              | 5.52             | 0.06 | 0.29                          | 2.81 | 99.86 | 30.35 | 1.93  | 6.02 | 2.58 |
| H573               | 1918                   | Two-mica granite | 72.53            | 0.12             | 16.93                          | 0.44                           | 0.54 | 0.24 | 0.95 | 0.51              | 5.01             | 0.05 | 0.15                          | 2.48 | 99.95 | 31.39 | 2.12  | 5.52 | 2.71 |

**Table S4.** Trace-element (ppm) compositions of the Zhuxi granites (H285 - H573) and Shuangqiaoshan Group (Bzx13-(01-08)).

| Sample      | La           | Ce           | Pr          | Nd          | Sm          | Eu          | Gd          | Tb          | Dy          | Ho          | Er          | Tm          | Yb          | Lu          | Y           | Cs            | Rb            | Ba            | Th          | U            | Nb           | Ta          | Pb           |
|-------------|--------------|--------------|-------------|-------------|-------------|-------------|-------------|-------------|-------------|-------------|-------------|-------------|-------------|-------------|-------------|---------------|---------------|---------------|-------------|--------------|--------------|-------------|--------------|
| <b>H285</b> | <b>11.00</b> | <b>22.37</b> | <b>2.66</b> | <b>9.56</b> | <b>2.33</b> | <b>0.38</b> | <b>2.20</b> | <b>0.40</b> | <b>2.08</b> | <b>0.30</b> | <b>0.78</b> | <b>0.11</b> | <b>0.66</b> | <b>0.10</b> | <b>9.51</b> | <b>135.40</b> | <b>439.40</b> | <b>134.80</b> | <b>5.07</b> | <b>10.82</b> | <b>10.83</b> | <b>2.28</b> | <b>25.86</b> |
| H289        | 24.12        | 48.22        | 5.72        | 20.68       | 4.17        | 0.53        | 3.39        | 0.48        | 2.34        | 0.34        | 0.88        | 0.12        | 0.73        | 0.11        | 9.70        | 170.10        | 432.30        | 85.90         | 12.79       | 11.62        | 8.72         | 1.59        | 10.07        |
| H307        | 20.59        | 40.96        | 4.79        | 17.54       | 3.64        | 0.50        | 3.08        | 0.46        | 2.27        | 0.33        | 0.92        | 0.13        | 0.85        | 0.12        | 10.79       | 179.50        | 437.70        | 128.80        | 11.09       | 9.02         | 12.12        | 2.80        | 11.89        |
| H313        | 21.14        | 42.46        | 5.03        | 18.16       | 3.71        | 0.57        | 2.99        | 0.41        | 1.90        | 0.28        | 0.68        | 0.10        | 0.61        | 0.09        | 8.03        | 127.70        | 449.60        | 163.30        | 11.66       | 7.88         | 11.27        | 2.46        | 10.14        |
| H325        | 10.87        | 21.84        | 2.60        | 9.32        | 2.11        | 0.31        | 2.00        | 0.34        | 1.97        | 0.33        | 0.94        | 0.16        | 1.05        | 0.15        | 10.26       | 123.60        | 364.60        | 80.10         | 5.75        | 10.72        | 9.00         | 2.31        | 23.34        |
| H462        | 38.36        | 77.90        | 9.02        | 32.64       | 5.90        | 1.05        | 4.42        | 0.52        | 2.05        | 0.25        | 0.64        | 0.07        | 0.43        | 0.05        | 7.60        | 62.54         | 311.10        | 450.50        | 16.28       | 4.14         | 13.57        | 1.64        | 34.14        |
| H465        | 36.93        | 74.98        | 8.71        | 31.81       | 5.84        | 0.97        | 4.23        | 0.50        | 2.03        | 0.26        | 0.64        | 0.07        | 0.42        | 0.06        | 7.60        | 126.00        | 518.90        | 329.00        | 15.53       | 6.75         | 12.78        | 1.76        | 31.71        |
| H469        | 32.60        | 66.06        | 7.73        | 28.12       | 5.41        | 0.97        | 4.30        | 0.55        | 2.49        | 0.35        | 0.89        | 0.12        | 0.81        | 0.11        | 10.41       | 78.25         | 359.30        | 339.70        | 15.03       | 7.06         | 13.20        | 1.55        | 36.36        |
| H522        | 7.88         | 16.71        | 2.06        | 7.71        | 2.14        | 0.28        | 2.22        | 0.44        | 2.70        | 0.48        | 1.39        | 0.24        | 1.59        | 0.23        | 15.54       | 49.23         | 319.20        | 80.10         | 4.30        | 19.88        | 11.09        | 2.48        | 38.86        |
| H530        | 10.70        | 22.61        | 2.76        | 10.15       | 2.67        | 0.37        | 2.51        | 0.45        | 2.72        | 0.45        | 1.32        | 0.22        | 1.55        | 0.21        | 14.75       | 81.18         | 393.80        | 159.60        | 5.15        | 16.30        | 10.97        | 3.05        | 48.86        |
| H569        | 14.08        | 28.65        | 3.44        | 12.83       | 2.96        | 0.55        | 2.56        | 0.40        | 2.18        | 0.32        | 0.85        | 0.13        | 0.79        | 0.12        | 10.02       | 107.50        | 549.90        | 158.90        | 6.76        | 7.71         | 11.40        | 2.65        | 36.37        |
| H573        | 12.51        | 25.46        | 3.06        | 11.32       | 2.72        | 0.42        | 2.51        | 0.43        | 2.37        | 0.37        | 0.99        | 0.16        | 1.06        | 0.14        | 11.65       | 80.05         | 484.80        | 128.70        | 6.38        | 13.20        | 10.79        | 2.11        | 33.46        |
| Bzx13-01    | 41.21        | 83.04        | 10.42       | 44.15       | 9.01        | 1.96        | 8.21        | 1.42        | 7.93        | 1.58        | 4.09        | 0.67        | 3.96        | 0.55        | 40.78       | 16.72         | 148.40        | 834.70        | 9.38        | 1.72         | 20.80        | 0.90        | 12.90        |
| Bzx13-02    | 39.11        | 75.13        | 8.68        | 36.14       | 7.38        | 1.67        | 6.91        | 1.25        | 7.24        | 1.43        | 3.71        | 0.63        | 3.52        | 0.49        | 37.65       | 11.25         | 80.90         | 368.40        | 7.80        | 1.17         | 15.30        | 0.79        | 16.79        |
| Bzx13-03    | 34.10        | 65.88        | 7.36        | 28.20       | 5.38        | 1.11        | 4.69        | 0.78        | 3.98        | 0.72        | 1.76        | 0.30        | 1.85        | 0.27        | 17.74       | 11.74         | 129.70        | 803.20        | 9.51        | 2.05         | 19.30        | 0.79        | 21.82        |
| Bzx13-04    | 41.10        | 78.82        | 8.78        | 34.45       | 6.34        | 1.19        | 5.34        | 0.92        | 4.86        | 0.98        | 2.60        | 0.47        | 2.77        | 0.41        | 25.73       | 8.85          | 94.30         | 263.70        | 11.67       | 2.37         | 14.20        | 0.86        | 11.15        |
| Bzx13-05    | 51.75        | 104.33       | 12.51       | 50.47       | 10.14       | 2.37        | 9.16        | 1.65        | 9.32        | 1.91        | 5.13        | 0.92        | 5.34        | 0.78        | 49.97       | 15.63         | 175.20        | 813.00        | 13.04       | 2.44         | 26.60        | 1.06        | 11.11        |
| Bzx13-06    | 30.80        | 60.32        | 6.81        | 27.10       | 5.44        | 1.10        | 4.76        | 0.84        | 4.68        | 0.94        | 2.39        | 0.43        | 2.63        | 0.39        | 23.89       | 9.50          | 108.80        | 275.70        | 10.31       | 1.98         | 15.10        | 0.98        | 14.34        |
| Bzx13-07    | 32.54        | 63.36        | 7.01        | 27.50       | 5.62        | 1.11        | 5.11        | 0.90        | 5.28        | 1.07        | 2.77        | 0.50        | 2.92        | 0.43        | 27.45       | 14.13         | 122.40        | 268.80        | 9.31        | 2.00         | 16.80        | 0.87        | 6.23         |
| Bzx13-08    | 41.12        | 83.15        | 9.28        | 36.54       | 7.25        | 1.34        | 6.32        | 1.08        | 6.46        | 1.38        | 3.68        | 0.68        | 3.94        | 0.57        | 35.94       | 47.23         | 205.30        | 465.80        | 13.45       | 2.63         | 19.00        | 0.97        | 11.69        |

| Sample   | Sr     | Zr     | Hf   | V      | Sc    | Co    | Ni    | Ga    | Cr    | W       | Zn     | Bi     | Cd      | Sn    | $\delta\text{Eu}$ | (La/Yb) <sub>N</sub> | (La/Sm) <sub>N</sub> | (Gd/Yb) <sub>N</sub> | $\Sigma\text{REE}$ | $\Sigma\text{LREE}$ | $\Sigma\text{HREE}$ | LREE/ HREE |
|----------|--------|--------|------|--------|-------|-------|-------|-------|-------|---------|--------|--------|---------|-------|-------------------|----------------------|----------------------|----------------------|--------------------|---------------------|---------------------|------------|
| H285     | 67.80  | 59.10  | 2.03 | 8.40   | 2.98  | 0.99  | 2.13  | 25.19 | 8.20  | 289.00  | 114.00 | 12.24  | 1905.20 | 11.32 | 0.52              | 11.94                | 3.05                 | 2.75                 | 54.92              | 48.30               | 6.62                | 7.30       |
| H289     | 71.10  | 88.10  | 3.58 | 8.00   | 3.01  | 1.39  | 2.08  | 26.58 | 6.50  | 1369.00 | 129.50 | 46.97  | 2275.26 | 13.70 | 0.43              | 23.64                | 3.74                 | 3.83                 | 111.82             | 103.43              | 8.39                | 12.33      |
| H307     | 96.80  | 74.70  | 2.84 | 8.80   | 2.40  | 2.23  | 1.89  | 32.85 | 7.30  | 4528.00 | 417.10 | 189.70 | 9250.97 | 26.58 | 0.45              | 17.44                | 3.65                 | 3.01                 | 96.17              | 88.02               | 8.16                | 10.79      |
| H313     | 53.20  | 82.70  | 3.04 | 10.20  | 3.18  | 1.87  | 2.11  | 20.24 | 4.70  | 1452.00 | 197.70 | 64.79  | 3773.82 | 22.94 | 0.52              | 25.06                | 3.68                 | 4.09                 | 98.11              | 91.07               | 7.04                | 12.94      |
| H325     | 62.20  | 44.40  | 2.11 | 10.60  | 2.48  | 2.68  | 1.78  | 20.78 | 11.20 | 1884.00 | 312.10 | 415.20 | 5984.12 | 20.79 | 0.46              | 7.43                 | 3.33                 | 1.57                 | 53.98              | 47.05               | 6.92                | 6.80       |
| H462     | 148.30 | 158.00 | 7.13 | 29.90  | 2.77  | 2.94  | 1.95  | 21.09 | 10.40 | 8.04    | 59.32  | 5.01   | 181.66  | 8.56  | 0.63              | 64.29                | 4.19                 | 8.53                 | 173.30             | 164.88              | 8.43                | 19.56      |
| H465     | 90.60  | 153.30 | 7.29 | 28.20  | 2.86  | 2.95  | 2.03  | 24.37 | 6.20  | 22.87   | 69.50  | 7.99   | 345.95  | 33.71 | 0.60              | 62.48                | 4.08                 | 8.25                 | 167.45             | 159.24              | 8.21                | 19.40      |
| H469     | 129.10 | 140.60 | 6.24 | 28.70  | 3.28  | 2.98  | 2.04  | 20.81 | 8.30  | 15.12   | 69.16  | 27.72  | 237.97  | 12.45 | 0.62              | 28.76                | 3.89                 | 4.37                 | 150.51             | 140.90              | 9.61                | 14.66      |
| H522     | 52.10  | 39.30  | 1.90 | 6.80   | 2.30  | 0.97  | 1.40  | 18.02 | 6.60  | 11.92   | 29.75  | 13.39  | 226.46  | 10.76 | 0.40              | 3.55                 | 2.38                 | 1.16                 | 46.09              | 36.78               | 9.31                | 3.95       |
| H530     | 38.40  | 40.20  | 1.93 | 8.60   | 2.60  | 1.35  | 1.71  | 19.91 | 5.70  | 468.40  | 34.74  | 33.93  | 312.36  | 12.36 | 0.43              | 4.96                 | 2.59                 | 1.34                 | 58.69              | 49.25               | 9.44                | 5.22       |
| H569     | 41.10  | 62.70  | 2.39 | 13.10  | 3.30  | 1.64  | 1.80  | 26.41 | 9.90  | 30.06   | 84.85  | 6.44   | 812.80  | 42.87 | 0.62              | 12.85                | 3.07                 | 2.70                 | 69.85              | 62.51               | 7.34                | 8.52       |
| H573     | 35.20  | 58.20  | 2.34 | 11.20  | 3.11  | 1.34  | 1.78  | 23.00 | 9.40  | 71.15   | 48.72  | 7.35   | 379.25  | 27.61 | 0.49              | 8.50                 | 2.97                 | 1.96                 | 63.50              | 55.49               | 8.01                | 6.92       |
| Bzx13-01 | 78.40  | 256.60 | 6.02 | 67.30  | 15.36 | 5.31  | 15.15 | 21.74 | 45.20 | 7.64    | 75.31  | 0.23   | 97.00   | 2.81  | 0.35              | 7.02                 | -                    | -                    | 218.20             | 189.79              | 28.41               | 6.68       |
| Bzx13-02 | 92.30  | 249.80 | 5.75 | 41.80  | 11.65 | 2.46  | 6.25  | 17.32 | 31.00 | 25.49   | 56.52  | 0.20   | 124.80  | 2.43  | 0.36              | 7.49                 | -                    | -                    | 193.28             | 168.10              | 25.18               | 6.68       |
| Bzx13-03 | 51.90  | 141.90 | 3.56 | 75.00  | 14.96 | 16.60 | 34.10 | 17.75 | 46.00 | 4.51    | 80.07  | 0.50   | 69.17   | 3.38  | 0.33              | 12.45                | -                    | -                    | 156.39             | 142.04              | 14.35               | 9.90       |
| Bzx13-04 | 39.70  | 336.00 | 8.49 | 78.20  | 11.35 | 7.51  | 22.24 | 13.06 | 99.30 | 3.48    | 81.22  | 0.15   | 41.92   | 2.74  | 0.30              | 10.00                | -                    | -                    | 189.03             | 170.68              | 18.35               | 9.30       |
| Bzx13-05 | 79.40  | 317.30 | 7.80 | 95.20  | 18.55 | 5.88  | 25.67 | 24.58 | 68.80 | 13.47   | 98.22  | 0.19   | 146.86  | 3.47  | 0.37              | 6.53                 | -                    | -                    | 265.78             | 231.56              | 34.21               | 6.77       |
| Bzx13-06 | 49.40  | 182.10 | 4.68 | 80.20  | 12.91 | 9.23  | 29.06 | 15.25 | 80.30 | 1.83    | 83.26  | 0.33   | 44.09   | 2.79  | 0.32              | 7.89                 | -                    | -                    | 148.64             | 131.56              | 17.07               | 7.71       |
| Bzx13-07 | 52.70  | 200.90 | 4.89 | 79.60  | 11.95 | 15.47 | 28.00 | 14.33 | 78.70 | 6.19    | 92.57  | 0.10   | 39.88   | 2.53  | 0.31              | 7.52                 | -                    | -                    | 156.12             | 137.15              | 18.97               | 7.23       |
| Bzx13-08 | 58.50  | 177.10 | 4.33 | 127.50 | 20.79 | 18.76 | 42.47 | 25.03 | 91.00 | 6.11    | 123.40 | 0.25   | 65.78   | 4.16  | 0.30              | 7.03                 | -                    | -                    | 202.79             | 178.69              | 24.11               | 7.41       |

Table S5. Zircon Hf isotopic compositions of the Zhuxi granites.

| No.                | Sample   | Age | $^{176}\text{Hf}/^{177}\text{Hf}$ | $2\delta$ | $^{176}\text{Lu}/^{177}\text{Hf}$ | $2\delta$ | $^{176}\text{Yb}/^{177}\text{Hf}$ | $2\delta$ | $\varepsilon_{\text{Hf}}(0)$ | $\varepsilon_{\text{Hf}}(t)$ | $1\delta$ | $T_{\text{DM1}}(\text{Ma})$ | $T_{\text{DM2}}(\text{Ma})$ | $f_{\text{Lu/Hf}}$ |
|--------------------|----------|-----|-----------------------------------|-----------|-----------------------------------|-----------|-----------------------------------|-----------|------------------------------|------------------------------|-----------|-----------------------------|-----------------------------|--------------------|
| <b>ZX4212-H289</b> |          |     |                                   |           |                                   |           |                                   |           |                              |                              |           |                             |                             |                    |
| 1                  | H289-1   | 160 | 0.282469                          | 0.000021  | 0.000277                          | 0.000001  | 0.008188                          | 0.000045  | -10.7                        | -7.2                         | 0.9       | 1087                        | 1671                        | -0.99              |
| 2                  | H289-2   | 161 | 0.282457                          | 0.000019  | 0.000466                          | 0.000001  | 0.013445                          | 0.000057  | -11.1                        | -7.7                         | 0.8       | 1109                        | 1698                        | -0.99              |
| 3                  | H289-3   | 160 | 0.282442                          | 0.000017  | 0.001163                          | 0.000011  | 0.031120                          | 0.000344  | -11.7                        | -8.3                         | 0.8       | 1150                        | 1736                        | -0.96              |
| 4                  | H289-4   | 159 | 0.282419                          | 0.000016  | 0.001404                          | 0.000041  | 0.037726                          | 0.001159  | -12.5                        | -9.2                         | 0.8       | 1192                        | 1792                        | -0.96              |
| 5                  | H289-5   | 157 | 0.282395                          | 0.000020  | 0.000518                          | 0.000005  | 0.013506                          | 0.000107  | -13.3                        | -9.9                         | 0.9       | 1197                        | 1840                        | -0.98              |
| 6                  | H289-6   | 160 | 0.282441                          | 0.000018  | 0.001149                          | 0.000015  | 0.030584                          | 0.000456  | -11.7                        | -8.3                         | 0.8       | 1152                        | 1739                        | -0.97              |
| 7                  | H289-7   | 161 | 0.282471                          | 0.000019  | 0.000485                          | 0.000003  | 0.013731                          | 0.000101  | -10.7                        | -7.2                         | 0.8       | 1091                        | 1668                        | -0.99              |
| 8                  | H289-8   | 164 | 0.282447                          | 0.000020  | 0.001071                          | 0.000004  | 0.027654                          | 0.000126  | -11.5                        | -8.0                         | 0.9       | 1141                        | 1723                        | -0.97              |
| 9                  | H289-9   | 160 | 0.282463                          | 0.000014  | 0.000553                          | 0.000002  | 0.015967                          | 0.000083  | -10.9                        | -7.5                         | 0.7       | 1104                        | 1686                        | -0.98              |
| 10                 | H289-10  | 158 | 0.282512                          | 0.000031  | 0.000517                          | 0.000002  | 0.015183                          | 0.000145  | -9.2                         | -5.8                         | 1.2       | 1035                        | 1577                        | -0.98              |
| 11                 | H289-11  | 162 | 0.282458                          | 0.000018  | 0.000393                          | 0.000001  | 0.011179                          | 0.000047  | -11.1                        | -7.6                         | 0.8       | 1106                        | 1695                        | -0.99              |
| 12                 | H289-12  | 159 | 0.282461                          | 0.000019  | 0.000520                          | 0.000001  | 0.015156                          | 0.000030  | -11.0                        | -7.6                         | 0.9       | 1105                        | 1691                        | -0.98              |
| <b>TW1.3</b>       |          |     |                                   |           |                                   |           |                                   |           |                              |                              |           |                             |                             |                    |
| 13                 | TW.1.3-1 | 137 | 0.282456                          | 0.000020  | 0.000815                          | 0.000009  | 0.022688                          | 0.000277  | -11.2                        | -8.2                         | 0.9       | 1120                        | 1716                        | -0.98              |
| 14                 | TW.1.3-2 | 150 | 0.282481                          | 0.000023  | 0.000952                          | 0.000007  | 0.026043                          | 0.000208  | -10.3                        | -7.1                         | 1.0       | 1090                        | 1655                        | -0.97              |
| 15                 | TW.1.3-3 | 171 | 0.282410                          | 0.000021  | 0.001212                          | 0.000028  | 0.031461                          | 0.000709  | -12.8                        | -9.2                         | 0.9       | 1197                        | 1802                        | -0.96              |
| 16                 | TW.1.3-4 | 169 | 0.282430                          | 0.000016  | 0.000839                          | 0.000004  | 0.024376                          | 0.000237  | -12.1                        | -8.5                         | 0.8       | 1158                        | 1757                        | -0.97              |
| 17                 | TW.1.3-5 | 149 | 0.282443                          | 0.000016  | 0.000461                          | 0.000002  | 0.012993                          | 0.000044  | -11.6                        | -8.4                         | 0.8       | 1129                        | 1738                        | -0.99              |

|                    |           |     |          |          |          |          |          |          |       |      |     |      |      |       |
|--------------------|-----------|-----|----------|----------|----------|----------|----------|----------|-------|------|-----|------|------|-------|
| 18                 | TW.1.3-6  | 159 | 0.282490 | 0.000019 | 0.000452 | 0.000002 | 0.012453 | 0.000076 | -10.0 | -6.5 | 0.8 | 1064 | 1626 | -0.99 |
| 19                 | TW.1.3-7  | 160 | 0.282456 | 0.000018 | 0.000353 | 0.000002 | 0.010428 | 0.000063 | -11.2 | -7.7 | 0.8 | 1108 | 1701 | -0.99 |
| 20                 | TW.1.3-8  | 174 | 0.282409 | 0.000020 | 0.000826 | 0.000008 | 0.021541 | 0.000208 | -12.9 | -9.1 | 0.9 | 1188 | 1802 | -0.98 |
| 21                 | TW.1.3-9  | 144 | 0.282476 | 0.000015 | 0.000387 | 0.000002 | 0.010498 | 0.000070 | -10.5 | -7.3 | 0.8 | 1081 | 1665 | -0.99 |
| 22                 | TW.1.3-10 | 142 | 0.282476 | 0.000016 | 0.000319 | 0.000001 | 0.008974 | 0.000008 | -10.5 | -7.4 | 0.8 | 1080 | 1668 | -0.99 |
| 23                 | TW.1.3-11 | 166 | 0.282419 | 0.000017 | 0.000303 | 0.000002 | 0.008303 | 0.000089 | -12.5 | -8.9 | 0.8 | 1157 | 1780 | -0.99 |
| 24                 | TW.1.3-12 | 150 | 0.282468 | 0.000019 | 0.000421 | 0.000003 | 0.011944 | 0.000064 | -10.7 | -7.5 | 0.8 | 1093 | 1680 | -0.99 |
| 25                 | TW.1.3-13 | 146 | 0.282451 | 0.000019 | 0.000496 | 0.000005 | 0.014844 | 0.000168 | -11.4 | -8.2 | 0.8 | 1119 | 1722 | -0.99 |
| 26                 | TW.1.3-14 | 151 | 0.282578 | 0.000020 | 0.001802 | 0.000010 | 0.050235 | 0.000060 | -6.9  | -3.7 | 0.9 | 976  | 1442 | -0.95 |
| 27                 | TW.1.3-15 | 145 | 0.282534 | 0.000017 | 0.000491 | 0.000001 | 0.014577 | 0.000024 | -8.4  | -5.3 | 0.8 | 1004 | 1536 | -0.99 |
| <b>ZX4212-H582</b> |           |     |          |          |          |          |          |          |       |      |     |      |      |       |
| 28                 | H582-1    | 146 | 0.282517 | 0.000027 | 0.000489 | 0.000007 | 0.014613 | 0.000180 | -9.0  | -5.9 | 1.1 | 1027 | 1573 | -0.99 |
| 29                 | H582-2    | 146 | 0.282431 | 0.000018 | 0.000410 | 0.000001 | 0.012093 | 0.000030 | -12.1 | -8.9 | 0.8 | 1143 | 1765 | -0.99 |
| 30                 | H582-3    | 147 | 0.282459 | 0.000019 | 0.001054 | 0.000028 | 0.029957 | 0.000599 | -11.1 | -8.0 | 0.9 | 1124 | 1706 | -0.97 |
| 31                 | H582-4    | 149 | 0.282544 | 0.000023 | 0.000613 | 0.000015 | 0.017398 | 0.000440 | -8.1  | -4.9 | 1.0 | 993  | 1512 | -0.98 |
| 32                 | H582-5    | 148 | 0.282492 | 0.000019 | 0.000692 | 0.000014 | 0.021079 | 0.000367 | -9.9  | -6.7 | 0.9 | 1067 | 1628 | -0.98 |
| 33                 | H582-6    | 152 | 0.282443 | 0.000018 | 0.000402 | 0.000004 | 0.012136 | 0.000146 | -11.6 | -8.4 | 0.8 | 1126 | 1736 | -0.99 |
| 34                 | H582-7    | 150 | 0.282470 | 0.000018 | 0.001204 | 0.000007 | 0.031711 | 0.000156 | -10.7 | -7.5 | 0.8 | 1113 | 1682 | -0.96 |
| 35                 | H582-8    | 149 | 0.282441 | 0.000017 | 0.000562 | 0.000009 | 0.015816 | 0.000311 | -11.7 | -8.5 | 0.8 | 1134 | 1742 | -0.98 |
| 36                 | H582-9    | 149 | 0.282494 | 0.000022 | 0.001078 | 0.000003 | 0.028126 | 0.000105 | -9.8  | -6.7 | 1.0 | 1075 | 1627 | -0.97 |
| 37                 | H582-10   | 171 | 0.282455 | 0.000016 | 0.000567 | 0.000005 | 0.016805 | 0.000090 | -11.2 | -8.0 | 0.8 | 1115 | 1711 | -0.98 |
| 38                 | H582-11   | 145 | 0.282517 | 0.000019 | 0.000884 | 0.000003 | 0.024670 | 0.000037 | -9.0  | -5.8 | 0.8 | 1037 | 1573 | -0.97 |
| 39                 | H582-12   | 147 | 0.282484 | 0.000019 | 0.000527 | 0.000003 | 0.014622 | 0.000078 | -10.2 | -7.0 | 0.9 | 1074 | 1646 | -0.98 |

$$\varepsilon_{\text{Hf}}(t) = \{[(^{176}\text{Hf}/^{177}\text{Hf})_{\text{S}} - (^{176}\text{Lu}/^{177}\text{Hf})_{\text{S}} - (e^{\lambda t} - 1)] / [(^{176}\text{Hf}/^{177}\text{Hf})_{\text{CHUR},0} - (^{176}\text{Lu}/^{177}\text{Hf})_{\text{CHUR}} - (e^{\lambda t} - 1)] - 1\} \times 10^5.$$

$$\text{TDM1} = 1/\lambda \times \ln\{1 + [(^{176}\text{Hf}/^{177}\text{Hf})_{\text{S}} - (^{176}\text{Hf}/^{177}\text{Hf})_{\text{DM}}] / [(^{176}\text{Lu}/^{177}\text{Hf})_{\text{S}} - (^{176}\text{Lu}/^{177}\text{Hf})_{\text{DM}}]\}.$$

$$\text{TDM2} = 1/\lambda \times \ln\{1 + [(^{176}\text{Hf}/^{177}\text{Hf})_{\text{S},t} - (^{176}\text{Hf}/^{177}\text{Hf})_{\text{DM},t}] / [(^{176}\text{Lu}/^{177}\text{Hf})_{\text{C}} - (^{176}\text{Lu}/^{177}\text{Hf})_{\text{DM}}]\} + t.$$

**Table S6.** Summary of U–Pb age data for Northeastern Jiangxi and adjacent regions.

| No. | Location             |        | Petrologic description | Age (Ma)    | Method    | Reference          |
|-----|----------------------|--------|------------------------|-------------|-----------|--------------------|
| 01  | Northeast<br>Jiangxi | Zhuxi  | Muscovite granite      | 147±1       | LA-ICP-MS | Wang et al., 2015  |
| 02  |                      |        | Granite                | 149±2       | LA-ICP-MS | Chen et al., 2015  |
| 03  |                      |        | Granite-porphyry       | 148±3       | LA-ICP-MS | Chen et al., 2015  |
| 04  |                      |        | Granite-porphyry       | 151±2       | LA-ICP-MS | Li et al., 2014a   |
| 05  |                      |        | Granite-porphyry       | 150±2       | LA-ICP-MS | Li et al., 2014a   |
| 06  |                      |        | Biotite monzogranite   | 149.38±0.86 | LA-ICP-MS | Song et al., 2018a |
| 07  |                      |        | Fine-grained granite   | 149.0±1.0   | LA-ICP-MS | Song et al., 2018a |
| 08  |                      |        | Granite porphyry       | 148.3±1.4   | LA-ICP-MS | Song et al., 2018a |
| 09  |                      |        | Granite porphyry       | 153.4±1.0   | LA-ICP-MS | Pan et al., 2018   |
| 10  |                      |        | Granite porphyry       | 150±1       | LA-ICP-MS | Pan et al., 2018   |
| 11  |                      |        | White granite          | 152.9±1.7   | LA-ICP-MS | Pan et al., 2018   |
| 12  |                      |        | Biotite granite        | 153.5±1.0   | LA-ICP-MS | Pan et al., 2018   |
| 13  |                      |        | lamprophyre            | 160.3±2.1   | LA-ICP-MS | Liu et al., 2014a  |
| 14  |                      | Henglu | Granite                | 158.8±2.2   | LA-ICP-MS | Li, 2017           |

| No. | Location         | Petrologic description                          | Age (Ma)    | Method    | Reference           |
|-----|------------------|-------------------------------------------------|-------------|-----------|---------------------|
| 15  | Keshan           | Biotite granite                                 | 161.6±3.0   | LA-ICP-MS | Li, 2017            |
| 16  | Zhangjiawu       | Granodiorite                                    | 160.6±2.7   | LA-ICP-MS | Li, 2017            |
| 17  | Zhenzhushan      | porphyritic muscovite granite                   | 129-133     | LA-ICP-MS | Liu et al., 2016    |
| 18  | Taqian           | Granodiorite porphyry                           | 160.9±2.5   | LA-ICP-MS | Hu et al., 2015     |
| 19  |                  | Porphyric-like muscovite granite                | 144.2±1.3   | LA-ICP-MS | Huang et al., 2012  |
| 20  | Dahutang         | Porphyritic granite                             | 134.6±1.2   | LA-ICP-MS | Huang et al., 2013  |
| 21  | (shiweidong)     | Porphyritic-like two-mica granite               | 144±1       | LA-ICP-MS | Huang et al., 2014  |
| 22  |                  | Porphyritic two-mica granite                    | 130±1       | LA-ICP-MS | Huang et al., 2014  |
| 23  |                  | Porphyritic biotite granite                     | 147.4±0.58  | LA-ICP-MS | Mao et al., 2015    |
| 24  |                  | Porphyritic biotite granite                     | 148.3±1.9   | LA-ICP-MS | Mao et al., 2015    |
| 25  | Northwest        | Fine grained biotite granite                    | 144.66±0.47 | LA-ICP-MS | Mao et al., 2015    |
| 26  | Jiangxi          | (shimensi) Fine grained biotite granite         | 146.0±0.64  | LA-ICP-MS | Mao et al., 2015    |
| 27  |                  | Granite porphyry                                | 143.0±0.76  | LA-ICP-MS | Mao et al., 2015    |
| 28  |                  | Granite porphyry                                | 143.1±1.2   | LA-ICP-MS | Mao et al., 2015    |
| 29  |                  | Middle-to-fine-grained muscovite granite        | 134±1       | LA-ICP-MS | Huang et al., 2014  |
| 30  |                  | Fine-granite two-mica granite                   | 131±1       | LA-ICP-MS | Huang et al., 2014  |
| 31  |                  | Muscovite granite                               | 151.6±2.6   | LA-ICP-MS | Liu et al., 2008    |
| 32  |                  | Fine-grained granite                            | 130±1.5     | SHRIMP    | Qin et al., 2010a   |
| 33  |                  | Granite-porphyry                                | 148.6±1.8   | SHRIMP    | Qin et al., 2010b   |
| 34  | South            | Dawujian Granodiorite-porphyry                  | 148.2±2.2   | LA-ICP-MS | Li et al., 2015     |
| 35  | Anhui            | Granite                                         | 140.5±1.3   | LA-ICP-MS | Chen et al., 2013   |
| 36  |                  | Granite                                         | 138.7±1.6   | LA-ICP-MS | Chen et al., 2013   |
| 37  |                  | Granite                                         | 142.0±1.6   | LA-ICP-MS | Chen et al., 2013   |
| 38  |                  | Biotite granite                                 | 158.9±1.3   | SIMS      | Huang et al., 2015  |
| 39  |                  | Two-mica granites                               | 156-159     | SIMS      | Huang et al., 2015  |
| 40  |                  | Muscovite granodiorite                          | 159.0±4.4   | SIMS      | Huang et al., 2015  |
| 43  | Xihuashan pluton | Granites                                        | 158~161     | SIMS      | Guo et al., 2011    |
| 44  | Taoxikeng        | Granites                                        | 158~159     | SHRIMP    | Guo et al., 2007    |
| 45  | Piaotang         | Granite                                         | 161.8±1     | LA-ICP-MS | Zhang et al., 2009a |
| 46  | Dajishan         | Granite                                         | 151.7±1.6   | LA-ICP-MS | Zhang et al., 2006  |
| 47  | South            | Pangushan Granite                               | 161.7±1.6   | LA-ICP-MS | Fang et al., 2014   |
| 48  | Jiangxi          | Kuimeishan Biotite granite                      | 157.7±2.7   | SHRIMP    | Li et al., 2014c    |
| 49  |                  | Medium to fine-grained porphyritic granodiorite | 164.4±1.1   | SHRIMP    | Feng et al., 2012   |
| 50  |                  | Medium to fine-grained granite                  | 156.6±3.9   | SHRIMP    | Feng et al., 2012   |
| 51  |                  | Granite                                         | 155~159     | SHRIMP    | Guo et al., 2011    |
| 52  | Tianmenshan      | Medium to coarse-grained biotite granite        | 157.2±2.2   | SHRIMP    | Feng et al., 2011a  |
| 53  | Tianmenshan      | Porphyritic biotite granite                     | 151.8±2.9   | SHRIMP    | Feng et al., 2011a  |
| 55  | Hongtaoling      | Biotite granite                                 | 151.4±3.1   | SHRIMP    | Feng et al., 2011a  |
| 56  | Zhangtiantang    | Fine-grained muscovite granite                  | 156.9±1.7   | SHRIMP    | Feng et al., 2011a  |
